# Supplementary material for: Solar fuels: research and development strategies to accelerate photocatalytic CO2 conversion into hydrocarbon fuels
Source: Royal Society of Chemistry journal article supplement (doi:10.1039/d1ee02714j), 2021-11-16
Supplement: d1ee02714j1.pdf [file d1ee02714j1.pdf]

## Supplementary Information

### **Solar fuels: Research and development strategies to accelerate photocatalytic CO<sub>2</sub> conversion into hydrocarbon fuels**

Eunhee Gong,<sup>†</sup> Shahzad Ali,<sup>†</sup> Chaitanya B. Hiragond,<sup>†</sup> Hong Soo Kim,<sup>†</sup> Niket S. Powar, Dongyun Kim, Hwapyong Kim and Su-Il In\*

Department of Energy Science & Engineering, Daegu Gyeongbuk Institute of Science and Technology (DGIST), 333 Techno Jungang-daero, Hyeonpung-eup, Dalseong-gun, Daegu 42988, Republic of Korea, E-mail: insuil@dgist.ac.kr.

<sup>†</sup> These authors contributed equally to this work.

## List of Abbreviations

| Abbreviation | Full name                                                       | Abbreviation | Full name                                             |
|--------------|-----------------------------------------------------------------|--------------|-------------------------------------------------------|
| 0D           | Zero-dimensional                                                | NPs          | Nanoparticles                                         |
| 1D           | One-dimensional                                                 | NSs          | Nanosheets                                            |
| 2D           | Two-dimensional                                                 | PAW          | Projector augmented-wave                              |
| AQY          | Apparent quantum yield                                          | PBE          | Perdew-Burke-Ernzerhof                                |
| BSE          | Bethe-Salpeter equation                                         | PCET         | Proton-coupled electron transfer                      |
| CB           | Conduction band                                                 | PL           | Photoluminescence                                     |
| CBM          | Conduction band minimum                                         | PSM          | Post-synthesis modification                           |
| CQDs         | Carbon quantum dots                                             | QDs          | Quantum dots                                          |
| DFT          | Density functional theory                                       | RGO          | Reduced graphene oxide                                |
| DRIFTS       | Diffuse reflectance infrared Fourier transform spectroscopy     | SEM          | Scanning electron microscopy                          |
| EE           | Energetic efficiency                                            | SEG          | Solvent-exfoliated graphene                           |
| EPR          | Electron paramagnetic resonance                                 | SIMS         | Secondary-ion mass spectrometry                       |
| FE           | Faradaic efficiency                                             | SPR          | Surface plasmon resonance                             |
| GC-MS        | Gas Chromatography-Mass Spectrometry                            | SRGO         | Solvent-reduced graphene oxide                        |
| GGA          | Generalized gradient approximation                              | STF          | Solar-to-fuel efficiency                              |
| GGGI         | Global Green Growth Institute                                   | SZF          | Single-zone furnaces                                  |
| GHGT         | International Conference on Greenhouse Gas Control Technologies | TAS          | Transient absorption spectroscopy                     |
| GIXANES      | Grazing-incidence X-ray absorption near-edge structure          | TEM          | Transmission electron microscopy                      |
| GO           | Graphene oxide                                                  | TMDCs        | Transition-metal dichalcogenides                      |
| GW           | Gradient wave                                                   | TOF          | Turnover frequency                                    |
| HER          | Hydrogen evolution reaction                                     | TON          | Turnover number                                       |
| HOMO         | Highest occupied molecular orbital                              | TRPL         | Time-resolved photoluminescence                       |
| ICCDU        | International Conference on Carbon Dioxide Utilization          | TZF          | Three-zone furnaces                                   |
| IR           | Infrared                                                        | UNEP         | United Nations Environment Programme                  |
| IPCC         | Intergovernmental Panel on Climate Change                       | UNFCCC       | United Nations Framework Convention on Climate Change |
| KIT          | Karlsruhe Institute of Technology                               | UV           | Ultraviolet                                           |
| LDH          | Layered double hydroxide                                        | VB           | Valence band                                          |
| LH           | Langmuir-Hinshelwood                                            | VASP         | Vienna Ab initio simulation package                   |
| LSPR         | Local surface plasmon resonance                                 | WRI          | World Resources Institute                             |
| LUMO         | Lowest unoccupied molecular orbital                             | XAFS         | X-ray absorption fine structure                       |
| MOFs         | Metal-organic frameworks                                        | XANES        | X-ray absorption near-edge structure                  |
| MS           | Mass spectroscopy                                               | XAS          | X-ray absorption spectroscopy                         |
| NAMD         | Nonadiabatic molecular dynamics                                 | $E_g$        | Bandgap                                               |
| NHE          | Normal hydrogen electrode                                       | $m_e^*$      | Charge carrier effective mass                         |
| NIR          | Near-infrared                                                   | $\Delta G$   | Gibbs free energy                                     |
| NMR          | Nuclear magnetic resonance                                      |              |                                                       |

※ Symbols associated with equations are explained in the main article.
